# Supplementary material for: Dinuclear 2,4-di(pyridin-2-yl)-pyrimidine based ruthenium photosensitizers for hydrogen photo-evolution under red light
Source: Royal Society of Chemistry journal article supplement (doi:10.1039/d1dt00868d), 2021-01-01
Supplement: d1dt00868d1.pdf [file d1dt00868d1.pdf]

Dinuclear 2,4-di(pyridin-2-yl)-pyrimidine based ruthenium photosensitizers for hydrogen photo-evolution under red light.

Mira T. Gamache<sup>1,2,3</sup>, Thomas Auvray<sup>1</sup>, Garry S. Hanan<sup>1</sup>, Dirk G. Kurth<sup>2</sup>

<sup>1</sup> *Département de Chimie, Université de Montréal, 1375 Avenue Thérèse-Lavoie-Roux, Montréal, Québec, H2V-03B, Canada*

<sup>2</sup> *Chemische Technologie der Materialsynthese, Julius-Maximilians-Universität Würzburg, Röntgenring 11, 97070 Würzburg, Germany*

<sup>3</sup> *Previously published under Mira T. Rupp*

## Supporting information

### S.I.-1 Instrumentation details

NMR experiments were performed on a Bruker AV-400 (<sup>1</sup>H: 400 MHz and <sup>13</sup>C{<sup>1</sup>H}: 101 MHz, Montréal, Canada) spectrometer, a Fourier 300 (<sup>1</sup>H: 300 MHz and <sup>13</sup>C{<sup>1</sup>H}: 75 MHz, Bruker Biospin, Rheinstetten, Germany) spectrometer or a Bruker Avance 500 (<sup>1</sup>H: 500 MHz and <sup>13</sup>C{<sup>1</sup>H}: 126 MHz, Montréal, Canada) spectrometer at 295 K. The chemical shifts are reported in ppm relative to the residual peak of the solvent as the internal standard. High-resolution mass spectrometry (HR-MS) was recorded either on a SYNAPT G2-Si spectrometer from Waters or on a Bruker Daltonics microQTOF spectrometer. Samples were ionized by electrospray ionization (ESI). UV-vis absorption spectra were recorded on an Agilent Cary6000i or Cary5000 UV-Vis-NIR spectrometer. Room-temperature emission and excitation spectra were recorded on a Jasco FP-8300 spectrometer equipped with a temperature control unit set to 20 °C or a LS 55 fluorescence spectrometer from PerkinElmer. Complexes were excited at 450 nm. The quantum yield was calculated using the dilute method<sup>1</sup> with [Ru(TolyItpy)<sub>2</sub>](PF<sub>6</sub>)<sub>2</sub> as reference.<sup>2</sup> Solutions with an absorbance ranging between 0.04 and 0.09 were used and the following equation was applied to obtain the quantum yield value. The reported value is an average from different measurements.

$$\Phi_1 = \frac{S_1}{S_{ref}} \times \frac{A_{ref}}{A_1} \times \phi_{ref} \quad \text{Equation S.I. 1}$$

$S_1$  and  $S_{ref}$  are the area of the emission peak,  $A_1$  and  $A_{ref}$  the absorbance of the corresponding solution and  $\Phi_1$  and  $\Phi_{ref}$  the quantum yield of our complex and of the reference, [Ru(TolyItpy)<sub>2</sub>](PF<sub>6</sub>)<sub>2</sub>, respectively.

For the luminescence lifetimes, an FLS920 fluorescence spectrometer (Edinburgh Instruments) using a 405 nm (room temperature measurements) or 508 nm (various temperature measurements) centered Hamamatsu diode laser was used. Sample solutions were degassed with nitrogen prior to measuring emission spectra or excited-state lifetimes. Electrochemical measurements were carried out in a three-electrode set-up with a glassy carbon disk (d=6mm) working electrode, a platinum coil as counter electrode and a platinum wire as pseudo-reference, using ferrocene as internal standard. The ferrocenium/ferrocene couple in acetonitrile was set to 0.40 V vs. SCE.<sup>3</sup> Measurements were made using a SP-50 BioLogic potentiostat interfaced to a computer equipped with the EC-lab software V11.21. Tetrabutylammonium hexafluorophosphate (TBAPF<sub>6</sub>) was used as electrolyte in a concentration of 0.1 M. The concentration of the analyte was 1 mM for complexes **Ref1** and **Ref2**, 0.25 mM for complex **C1** and 0.5 mM for **C2**. The samples were purged by nitrogen before each measurement. The cyclic voltammograms were recorded with a sweep rate of 100 mV/s in dried acetonitrile (Acros, HPLC grade).

## S.I.-2 NMR spectra

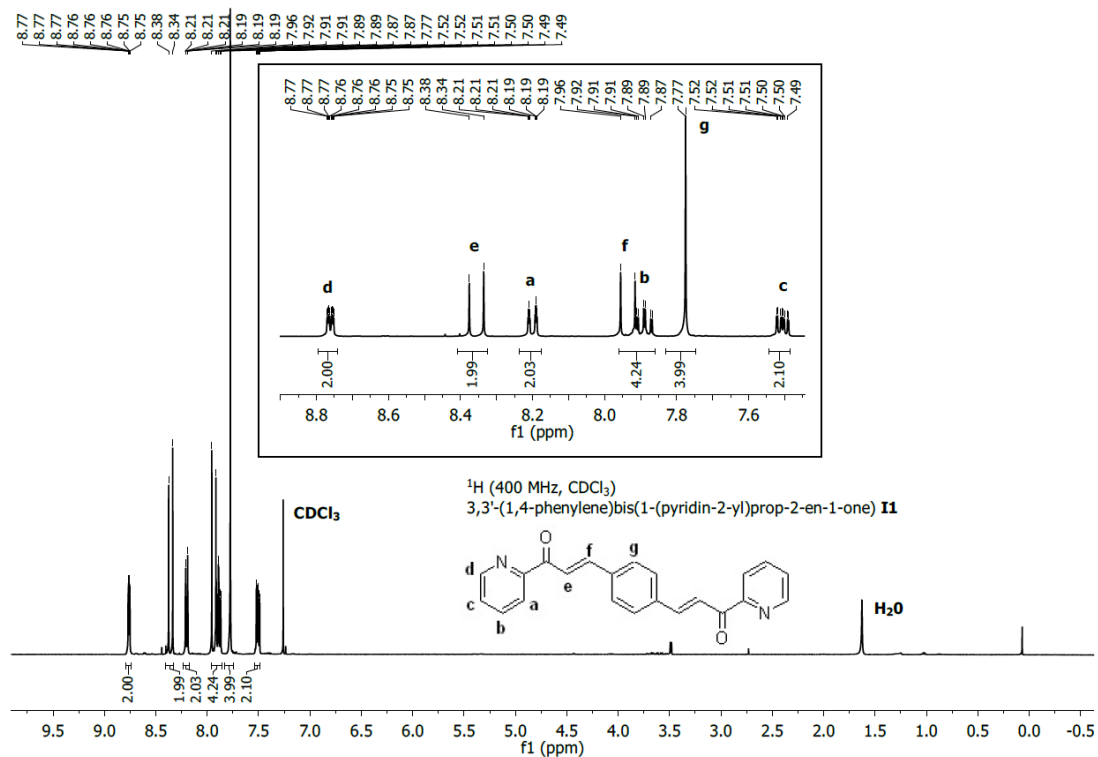

Figure S.I. 1. <sup>1</sup>H-NMR spectrum (400 MHz, CDCl<sub>3</sub>) of 3,3'-(1,4-phenylene)-bis(1-(pyridine-2-yl)prop-2-en-1-one) **I1**.

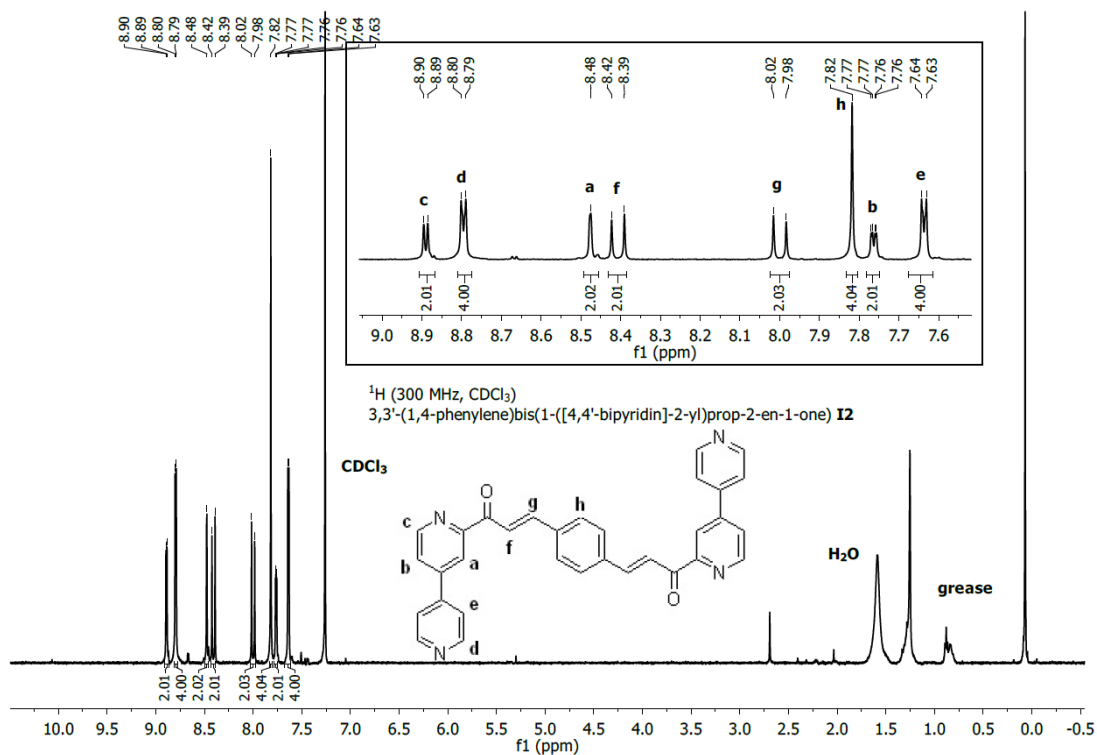

Figure S.I. 2. <sup>1</sup>H-NMR spectrum (300 MHz, CDCl<sub>3</sub>) of 3,3'-(1,4-phenylene)-bis(1-([4,4'-bipyridin]-2-yl)prop-2-en-1-one) **I2**.

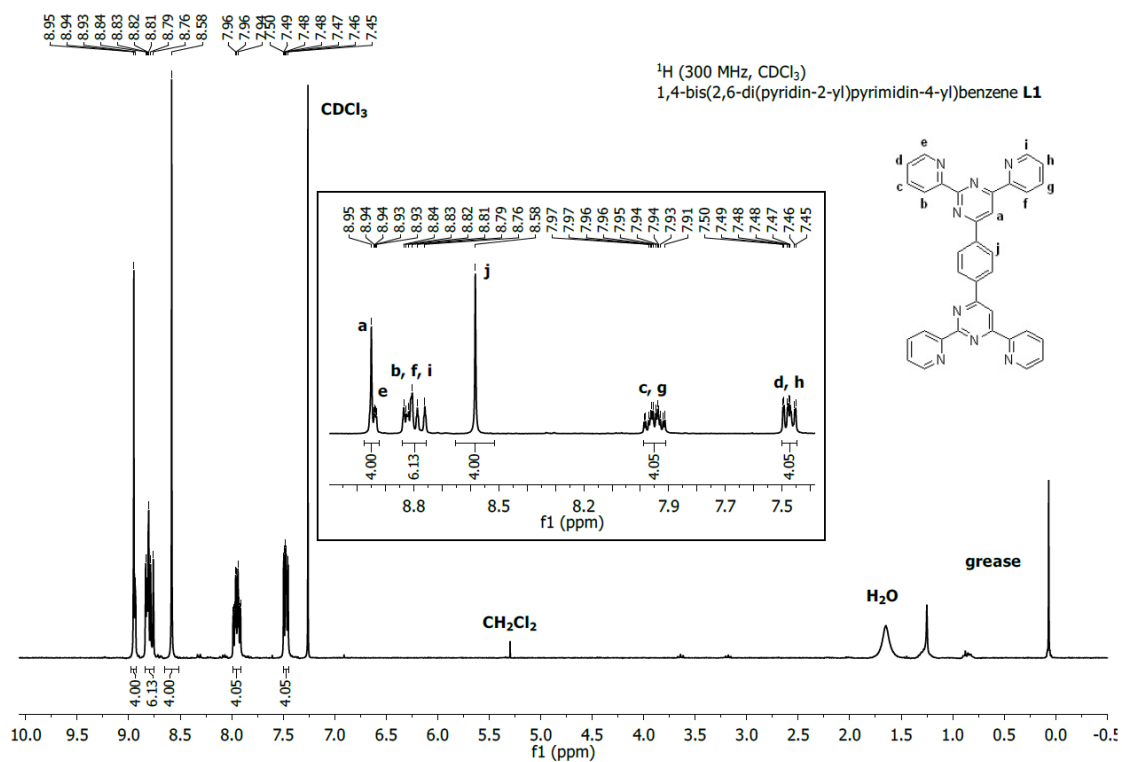

Figure S.I. 3. <sup>1</sup>H-NMR spectrum (300 MHz, CDCl<sub>3</sub>) of 1,4-bis(2,6-di(pyridin-2-yl)pyrimidin-4-yl)benzene **L1**.

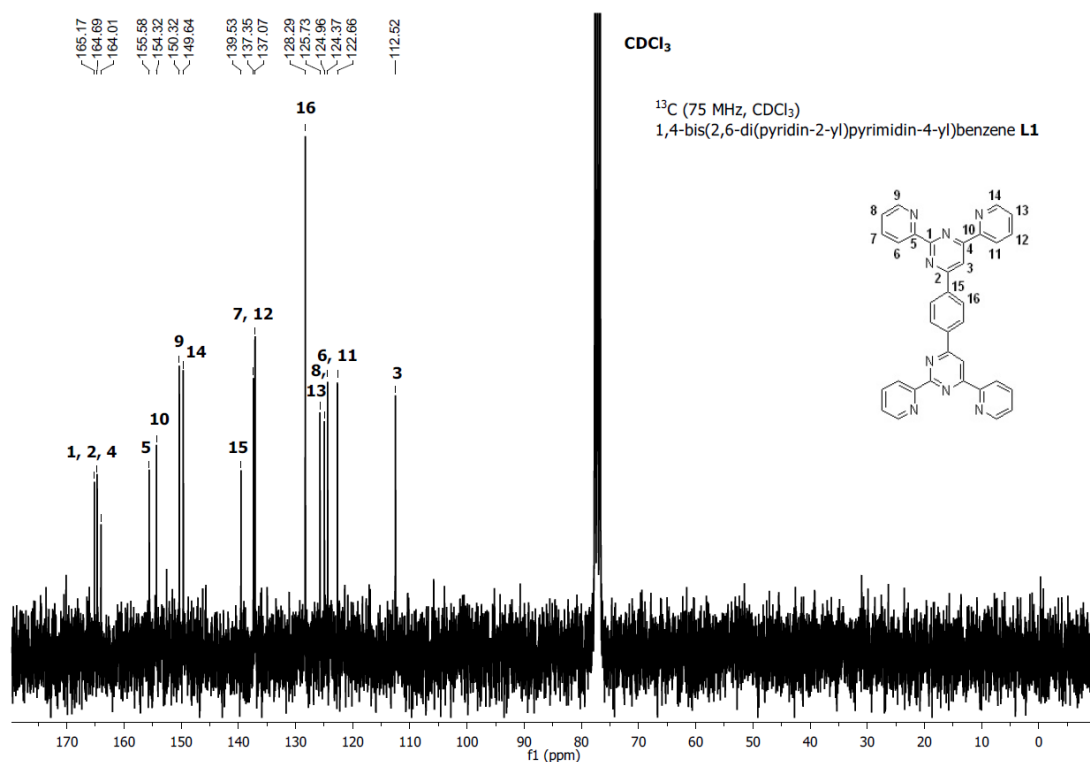

Figure S.I. 4. <sup>13</sup>C-NMR spectrum (75 MHz, CDCl<sub>3</sub>) of 1,4-bis(2,6-di(pyridin-2-yl)pyrimidin-4-yl)benzene **L1**.

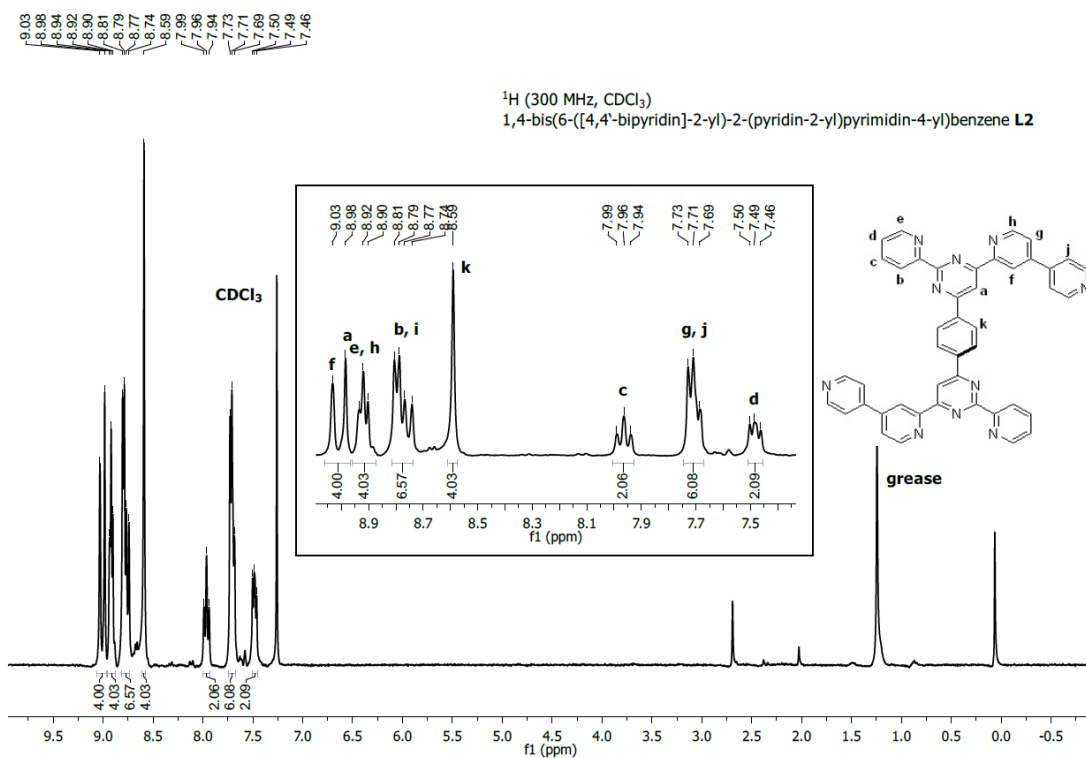

Figure S.I. 5. <sup>1</sup>H-NMR spectrum (300 MHz, CDCl<sub>3</sub>) of 1,4-bis(6-([4,4'-bipyridin]-2-yl)-2-(pyridin-2-yl)pyrimidin-4-yl)benzene **L2**.

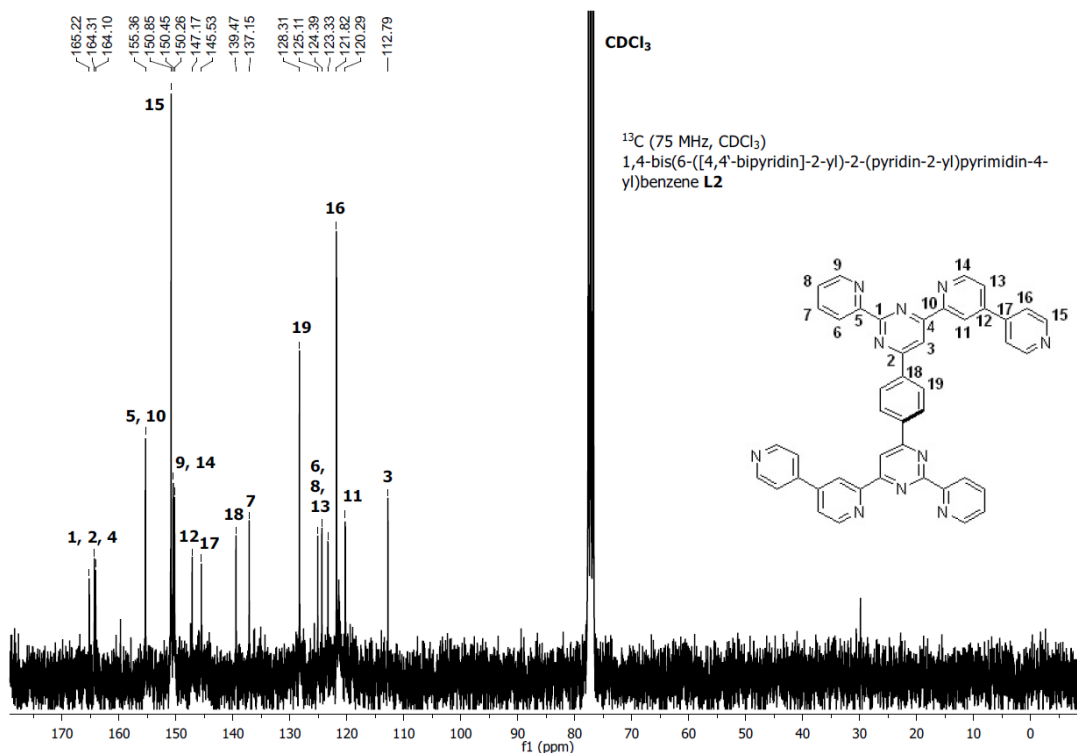

Figure S.I. 6. <sup>13</sup>C-NMR spectrum (75 MHz, CDCl<sub>3</sub>) of 1,4-bis(6-([4,4'-bipyridin]-2-yl)-2-(pyridin-2-yl)pyrimidin-4-yl)benzene **L2**.

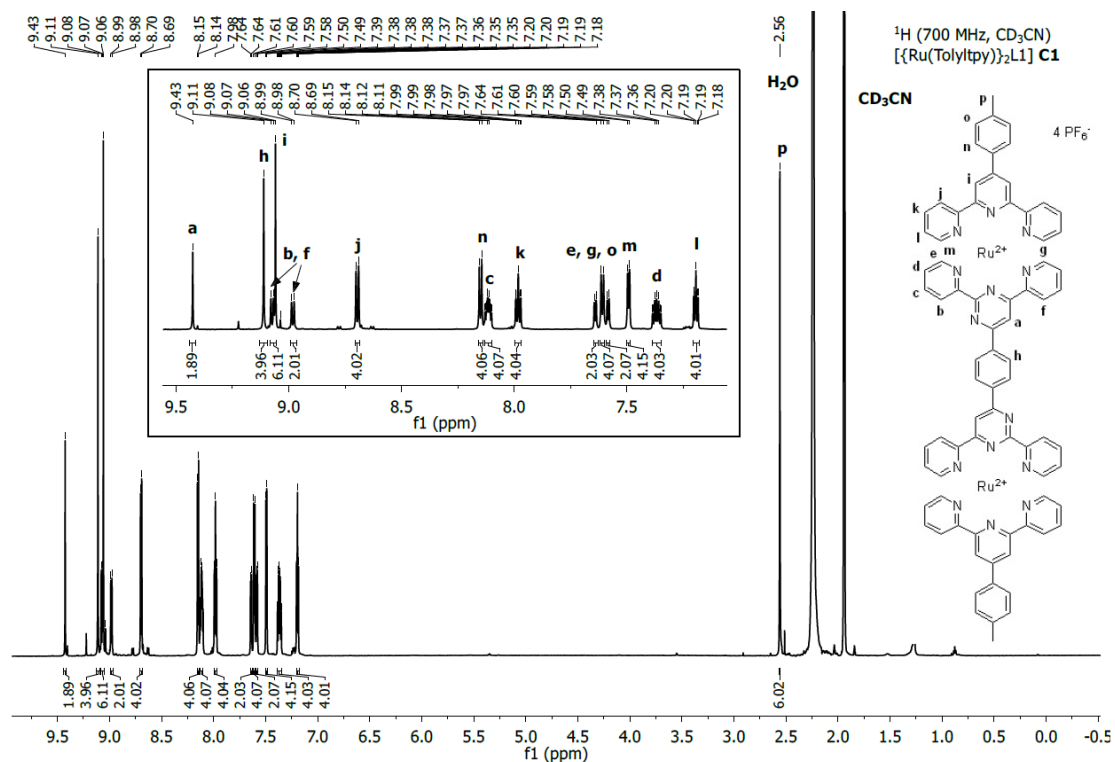

Figure S.I. 7. <sup>1</sup>H-NMR spectrum (700 MHz, CD<sub>3</sub>CN) of [Ru(Tolytpy)]<sub>2</sub>L1 C1.

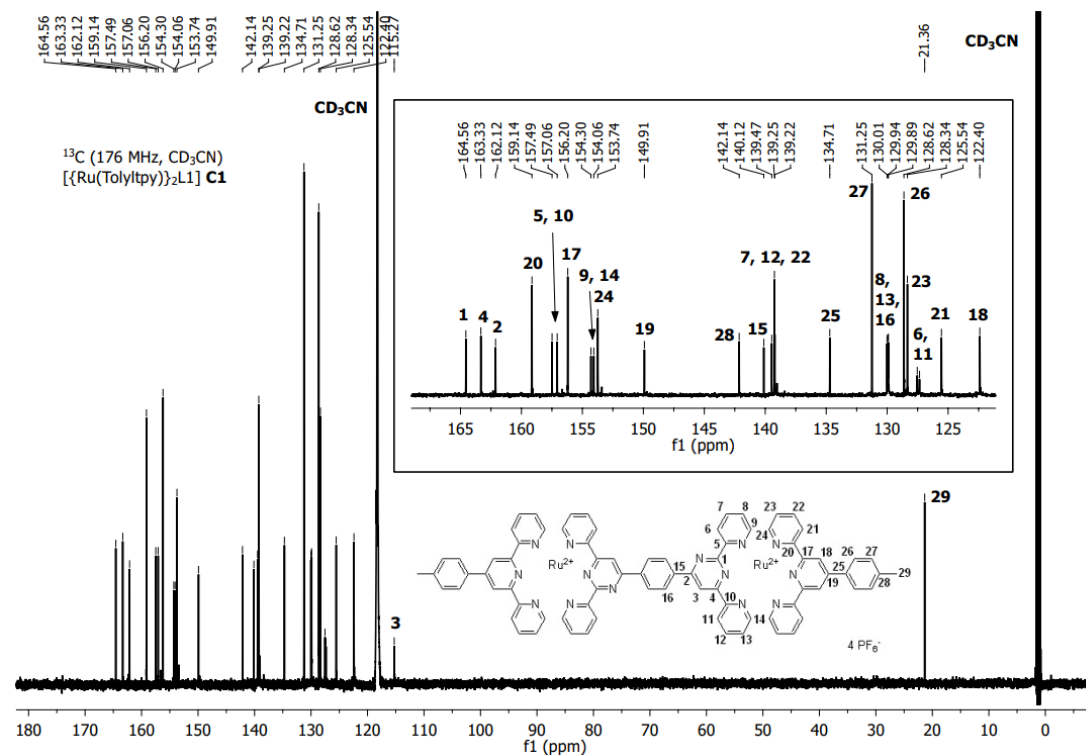

Figure S.I. 8. <sup>13</sup>C-NMR spectrum (176 MHz, CD<sub>3</sub>CN) of [Ru(Tolytpy)]<sub>2</sub>L1 C1.

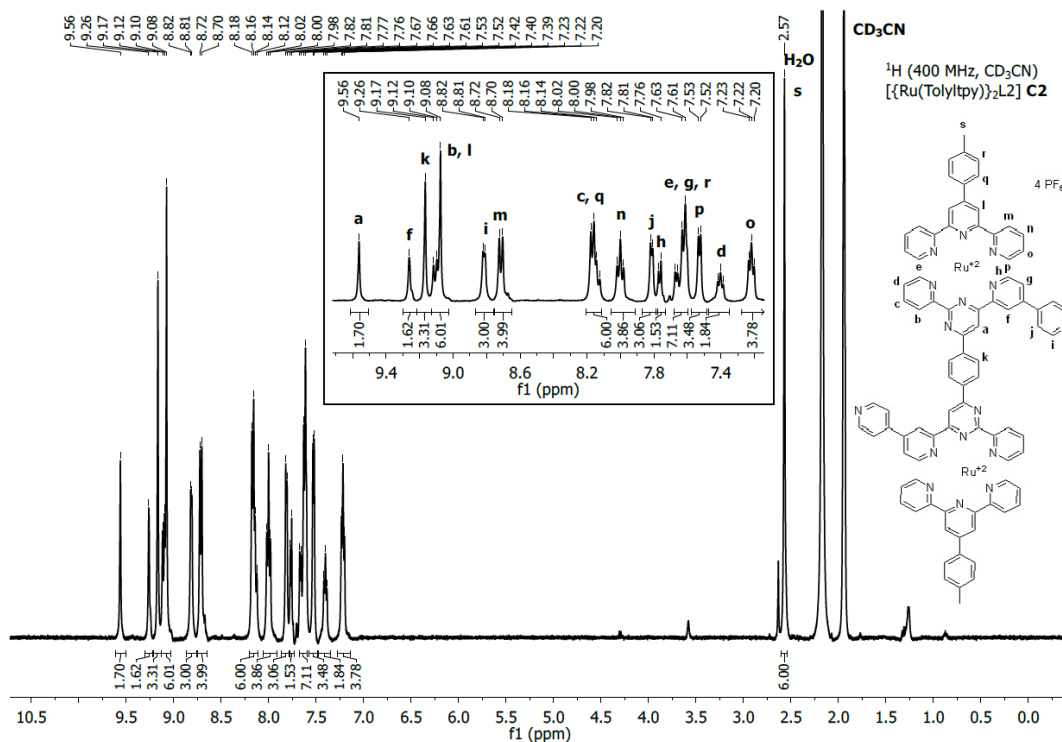

Figure S.I. 9.  $^1\text{H}$ -NMR spectrum (400 MHz,  $\text{CD}_3\text{CN}$ ) of  $[\{\text{Ru}(\text{Tolyltpy})\}_2\text{L}_2]$  C2.

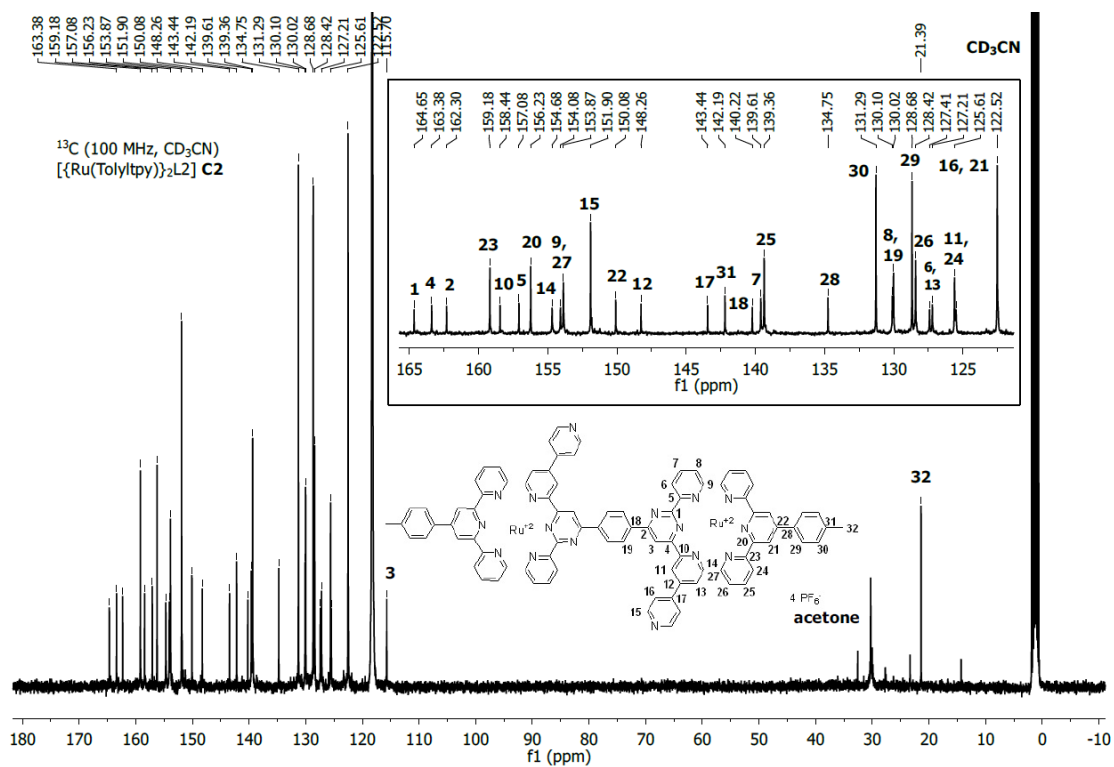

Figure S.I. 10.  $^{13}\text{C}$ -NMR spectrum (100 MHz,  $\text{CD}_3\text{CN}$ ) of  $[\{\text{Ru}(\text{Tolyltpy})\}_2\text{L}_2]$  C2.

### S.I.-3 Photophysical properties

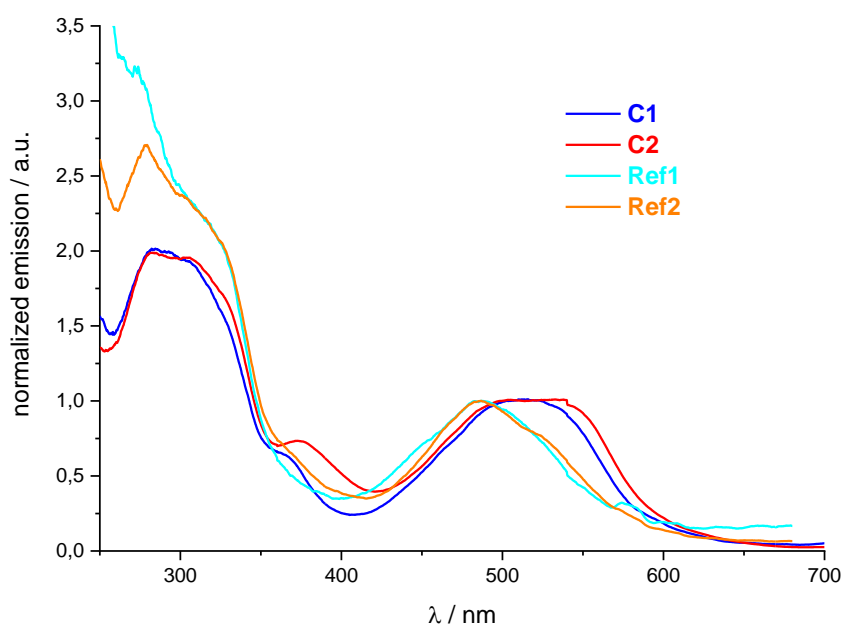

Figure S.I. 11. Excitation spectra of complexes **C1**, **C2**, **Ref1** and **Ref2** in inert-gas purged acetonitrile; spectra are normalized so that the emission intensity at the MLCT band is 1.

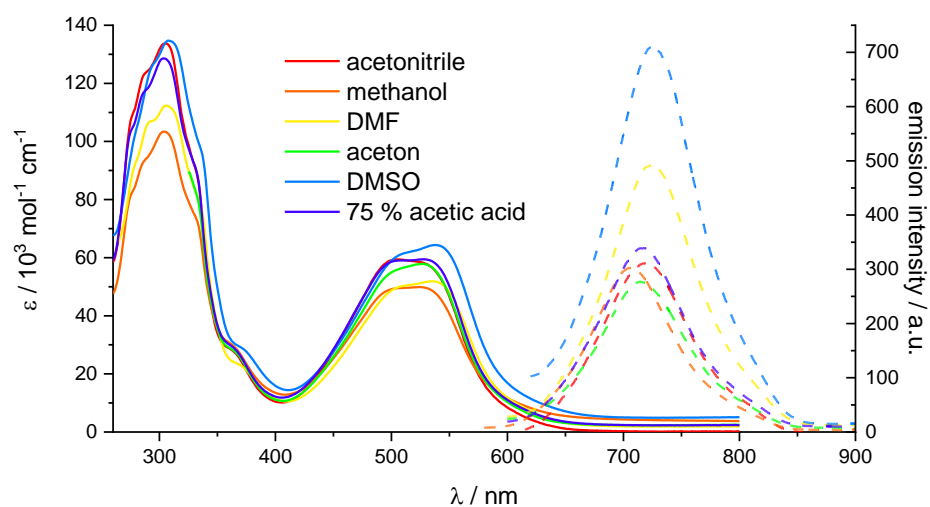

Figure S.I. 12. UV-vis absorption spectra (solid lines) and emission spectra (dashed lines) of complex **C1** in different inert-gas purged solvents; emission spectra are normalized with regard to the absorptivity of the sample solution at the excitation wavelength and the refractive index of the solvent.

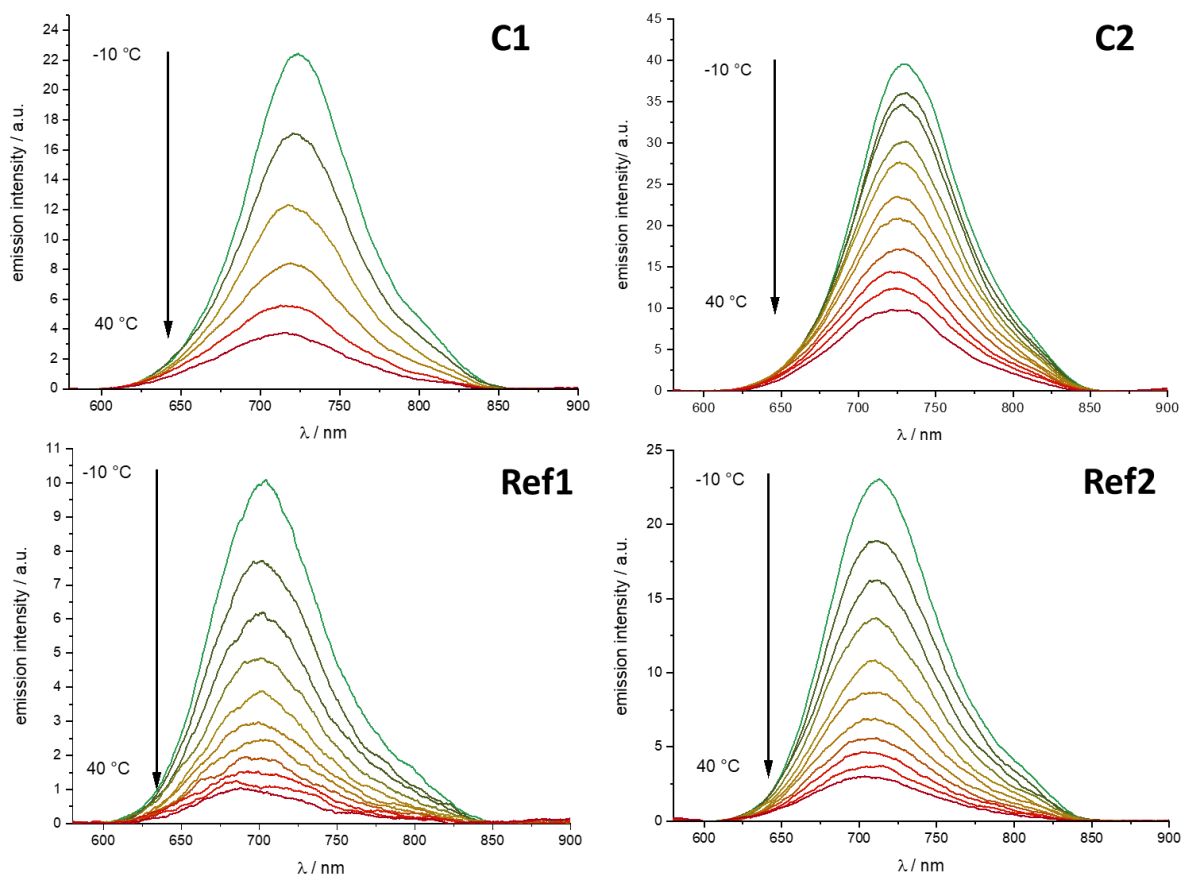

Figure S.I. 13. Emission spectra of complexes **C1**, **C2**, **Ref1** and **Ref2** in inert-gas purged acetonitrile at different temperatures; temperatures vary between +40 °C and -10 °C.

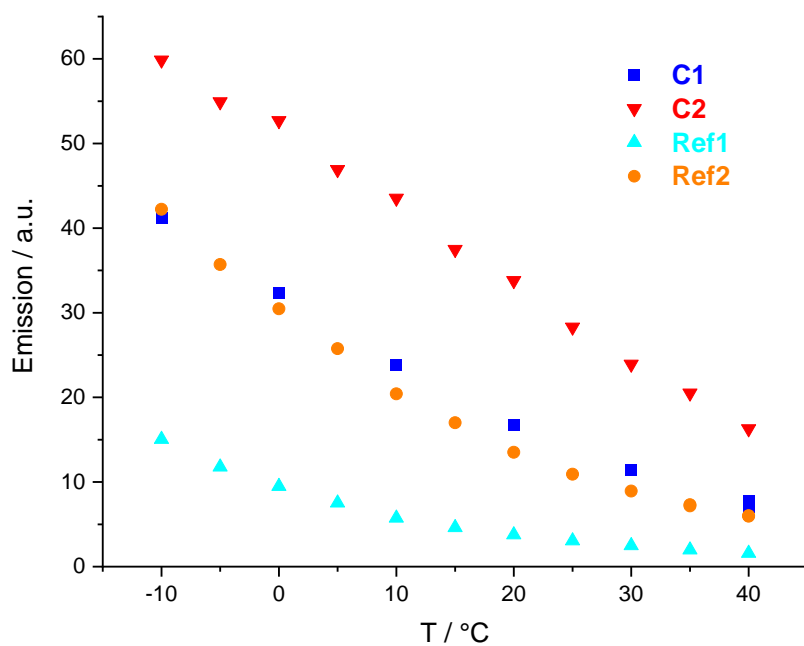

Figure S.I. 14. Temperature-dependence of the emission quantum yield of complexes **C1**, **C2**, **Ref1** and **Ref2** in inert-gas purged acetonitrile.



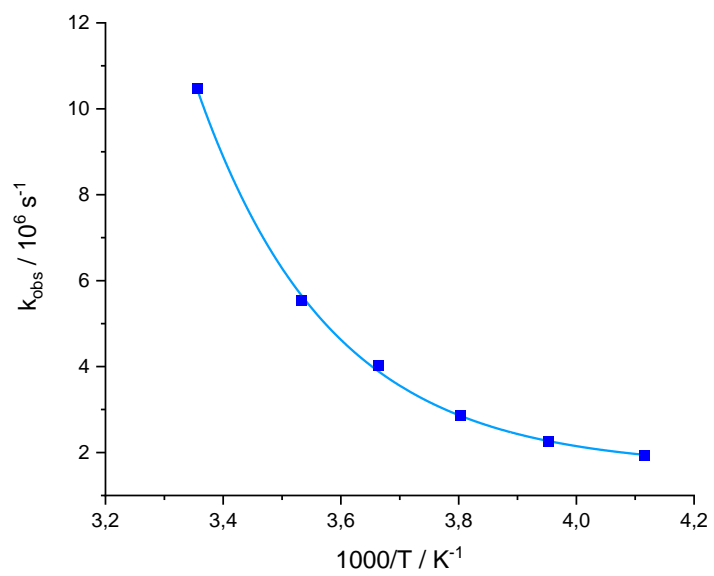

Figure S.I. 15. Plot of  $k_{\text{obs}} (1/\tau)$  vs.  $1000/T$  for **C1**. Curve fit according to Equation 2 of the manuscript.

#### S.I.-4 Electrochemistry

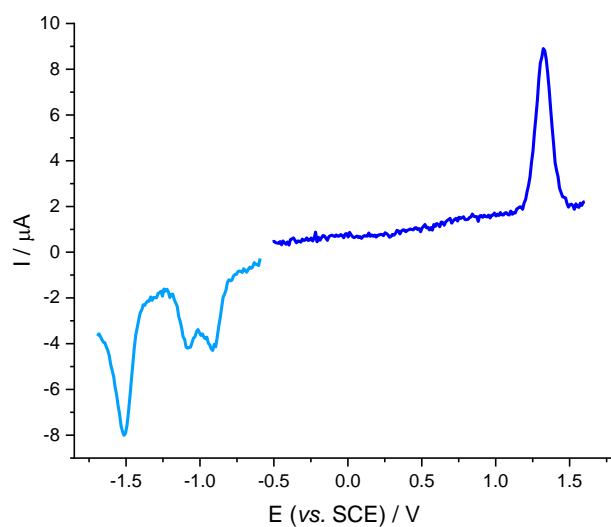

Figure S.I. 16. Square wave voltammogram of complex **C1** (0.25 mM) in dry acetonitrile under inert gas atmosphere, with 0.1 M TBAPF<sub>6</sub>.

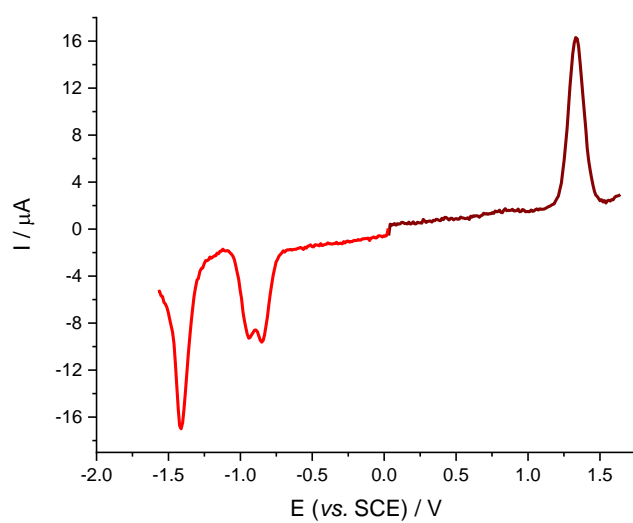

Figure S.I. 17. Square wave voltammogram of complex **C2** (0.5 mM) in dry acetonitrile under inert gas atmosphere, with 0.1 M TBAPF<sub>6</sub>.

### S.I.-5 Computational details

The calculations were made with Gaussian16 rev.B.01<sup>4</sup>, using the PBE0 hybrid functional<sup>5</sup> with LanL2DZ<sup>6-9</sup> as basis set. The optimizations were conducted without symmetry constraints, followed by frequency calculations to confirm that energy minima had been reached in all cases. The energy, oscillator strength, and related MO contributions for the 100 lowest singlet–singlet and 10 lowest singlet–triplet excitations were obtained from the TD-DFT/singlets and the TD-DFT/triplets output files, respectively, for the  $S_0$ -optimized geometry. GaussView6, GaussSum3.3<sup>10</sup> and Chemission4.53<sup>11</sup> were used for data analysis, visualization and surface plots. All calculations were conducted for acetonitrile solvated complexes using a conductor like polarized continuum (CPCM) solvation model.<sup>12</sup>

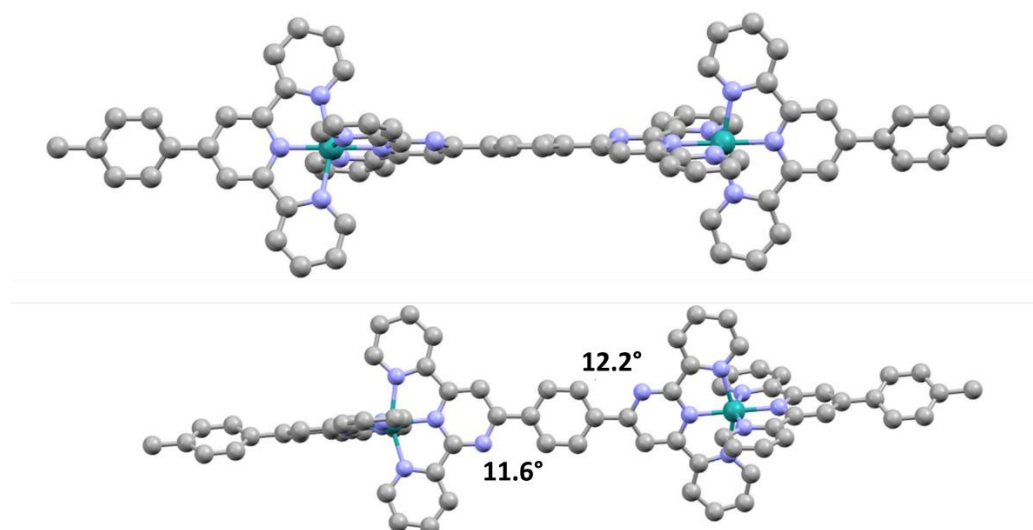

Figure S.I. 18. Optimized geometry of **C1** with 11.6° and 12.2° torsion angles of the phenyl bridge.

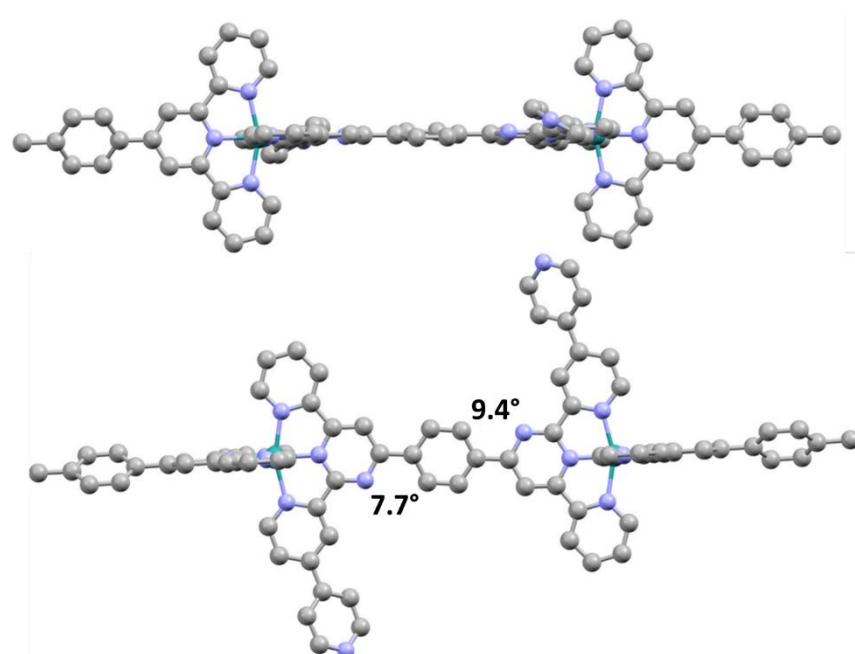

Figure S.I. 19. Optimized geometry of **C2** with 7.7° and 9.4° torsion angles of the phenyl bridge.

Table S.I. 1. Contributions to MOs for complexes **C1** and **C2**.

|      | <b>C1</b>                                                                          |                                                                                    |                                                                                   | <b>C2</b>                                                                          |                                                                                      |                                                                                      |
|------|------------------------------------------------------------------------------------|------------------------------------------------------------------------------------|-----------------------------------------------------------------------------------|------------------------------------------------------------------------------------|--------------------------------------------------------------------------------------|--------------------------------------------------------------------------------------|
| HOMO | 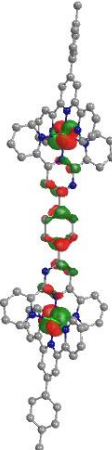  |   |  |   |   |   |
|      | -6.61 eV<br>Ru: 61 %<br>Tolytpy: 8 %<br><b>L1: 31 %</b>                            | -6.63 eV<br>Ru: 56 %<br>Tolytpy: 36 %<br><b>L1: 8 %</b>                            | -6.63 eV<br>Ru: 56 %<br>Tolytpy: 36 %<br><b>L1: 8 %</b>                           | -6.64 eV<br>Ru: 60 %<br>Tolytpy: 9 %<br><b>L2: 31 %</b>                            | -6.65 eV<br>Ru: 55 %<br>Tolytpy: 37 %<br><b>L2: 8 %</b>                              | -6.65 eV<br>Ru: 55 %<br>Tolytpy: 37 %<br><b>L2: 8 %</b>                              |
| LUMO |  |  |                                                                                   |  |  |  |
|      | -3.42 eV<br>Ru: 9 %<br>Tolytpy: 1 %<br><b>L1: 90 %</b>                             | -3.04 eV<br>Ru: 2 %<br>Tolytpy: 2 %<br><b>L1: 96 %</b>                             |                                                                                   | -3.44 eV<br>Ru: 9 %<br>Tolytpy: 1 %<br><b>L2: 90 %</b>                             | -3.09 eV<br>Ru: 2 %<br>Tolytpy: 2 %<br><b>L2: 96 %</b>                               | -3.08 eV<br>Ru: 2 %<br>Tolytpy: 2 %<br><b>L2: 96 %</b>                               |

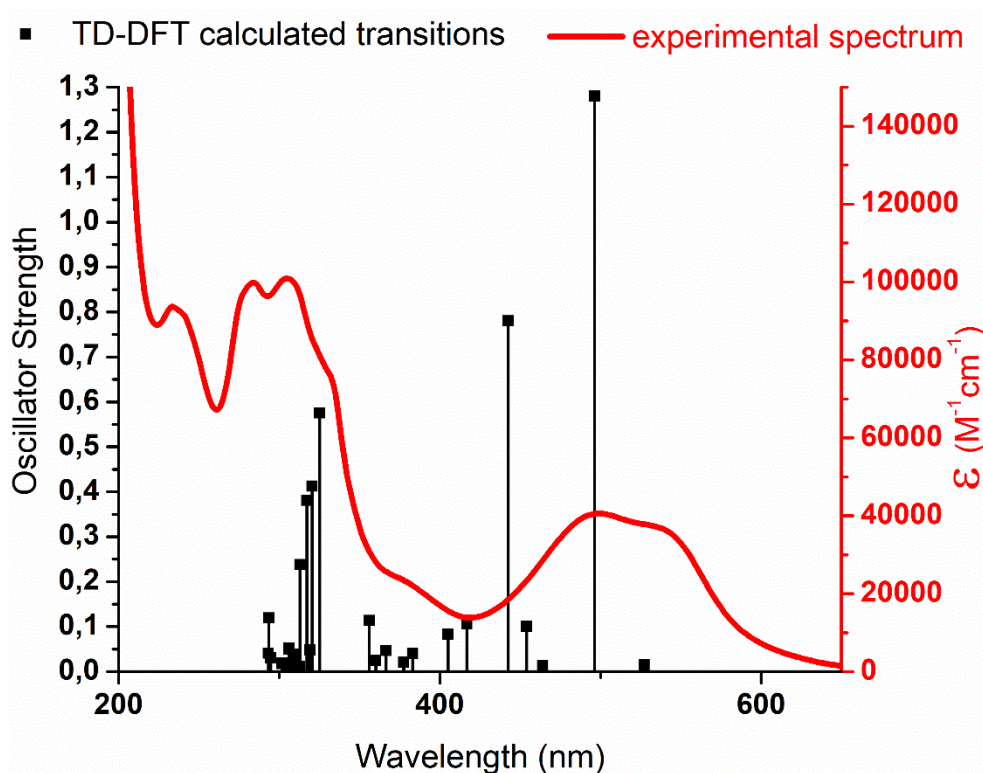

Figure S.I. 20. Comparison of the experimental absorption spectra with the predicted transitions (oscillator strength > 0.05) for complex **C1** in acetonitrile.

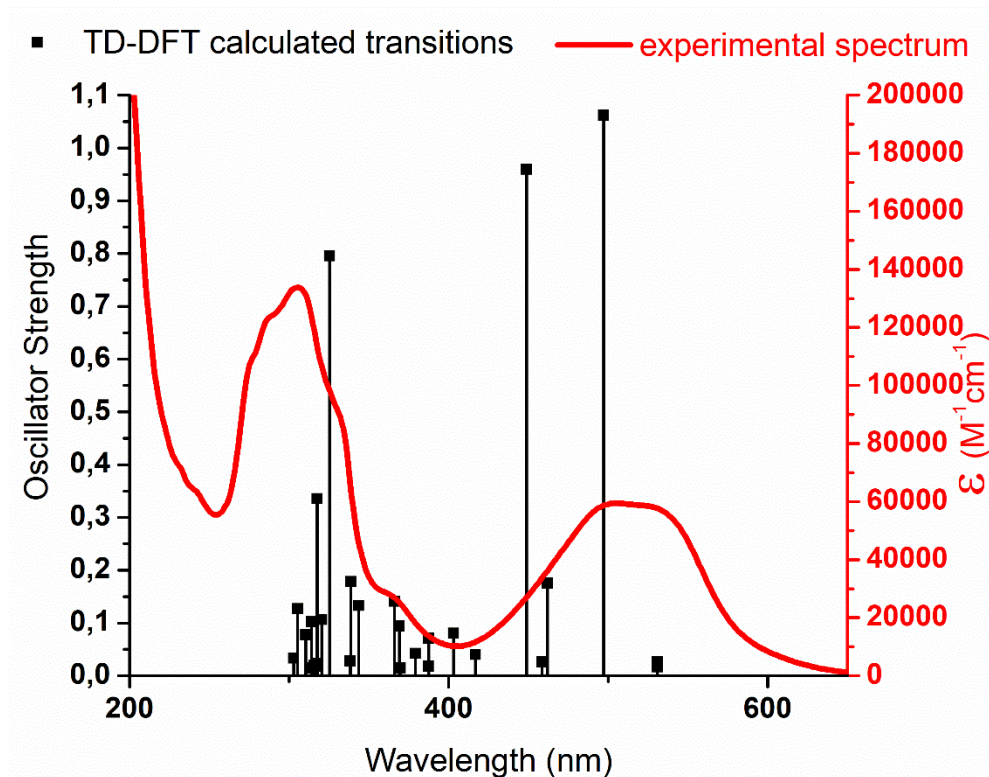

Figure S.I. 21. Comparison of the experimental absorption spectra with the predicted transitions (oscillator strength > 0.05) for complex **C2** in acetonitrile.

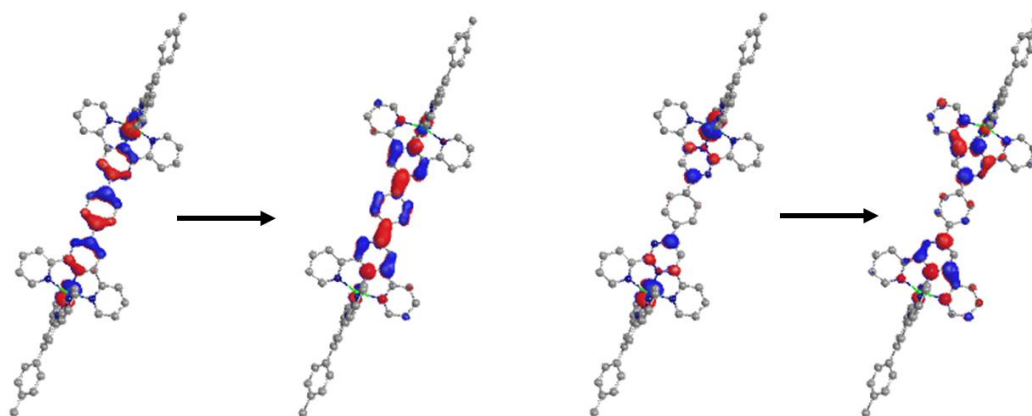

Figure S.I. 22. Natural transition analysis of the lowest singlet-triplet transition (= emissive state) of complex **C1**; (76/20, left/right).

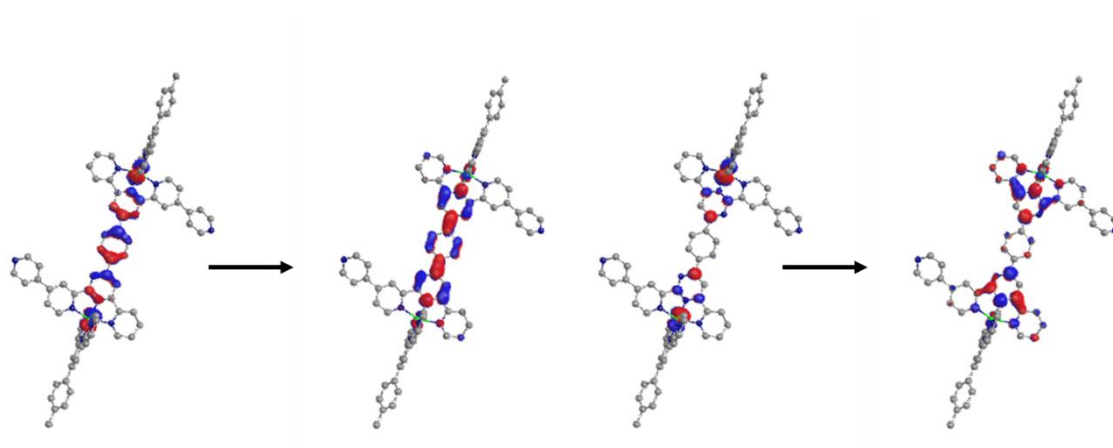

Figure S.I. 23. Natural transition analysis of the lowest singlet-triplet transition (= emissive state) of complex **C2**; (77/20, left/right).

Table S.I. 2. Atomic coordinates of the optimized geometry of C1.

| Center | Atomic number | Coordinates (Angstroms) |        |        | Center | Atomic number | Coordinates (Angstroms) |         |        |
|--------|---------------|-------------------------|--------|--------|--------|---------------|-------------------------|---------|--------|
|        |               | X                       | Y      | Z      |        |               | X                       | Y       | Z      |
| 1      | 7             | 9,580                   | 0,002  | -0,019 | 76     | 1             | 18,600                  | 0,1703  | -0,752 |
| 2      | 6             | 12,358                  | -0,113 | 0,037  | 77     | 1             | 18,559                  | -1,3714 | 0,109  |
| 3      | 6             | 10,237                  | -0,589 | -1,053 | 78     | 1             | 18,605                  | 0,1557  | 1,014  |
| 4      | 6             | 10,242                  | 0,537  | 1,042  | 79     | 6             | -2,890                  | -0,0944 | 0,149  |
| 5      | 6             | 11,636                  | 0,488  | 1,091  | 80     | 7             | -5,616                  | -0,1102 | 0,138  |
| 6      | 6             | 11,632                  | -0,655 | -1,047 | 81     | 7             | -3,566                  | 0,6206  | -0,799 |
| 7      | 1             | 12,164                  | 0,890  | 1,948  | 82     | 6             | -3,588                  | -0,8372 | 1,132  |
| 8      | 1             | 12,159                  | -1,100 | -1,881 | 83     | 6             | -4,983                  | -0,8340 | 1,103  |
| 9      | 6             | 9,327                   | -1,096 | -2,095 | 84     | 6             | -4,900                  | 0,5945  | -0,776 |
| 10     | 6             | 7,449                   | -1,972 | -3,936 | 85     | 1             | -3,056                  | -1,3841 | 1,897  |
| 11     | 7             | 7,985                   | -0,893 | -1,852 | 86     | 6             | -5,925                  | -1,5217 | 1,998  |
| 12     | 6             | 9,755                   | -1,740 | -3,260 | 87     | 6             | -7,867                  | -2,7300 | 3,554  |
| 13     | 6             | 8,810                   | -2,184 | -4,192 | 88     | 7             | -7,260                  | -0,3129 | 1,705  |
| 14     | 6             | 7,076                   | -1,323 | -2,756 | 89     | 6             | -5,537                  | -2,3339 | 3,067  |
| 15     | 1             | 10,811                  | -1,896 | -3,442 | 90     | 6             | -6,516                  | -2,9465 | 3,857  |
| 16     | 1             | 9,131                   | -2,685 | -5,099 | 91     | 6             | -8,200                  | -1,9094 | 2,472  |
| 17     | 1             | 6,034                   | -1,142 | -2,525 | 92     | 1             | -4,486                  | -2,4887 | 3,281  |
| 18     | 1             | 6,685                   | -2,299 | -4,631 | 93     | 1             | -9,233                  | -1,7219 | 2,209  |
| 19     | 6             | 9,337                   | 1,116  | 2,049  | 94     | 1             | -8,656                  | -3,1856 | 4,140  |
| 20     | 6             | 7,465                   | 2,145  | 3,817  | 95     | 6             | -5,750                  | 1,3195  | -1,732 |
| 21     | 6             | 9,769                   | 1,720  | 3,234  | 96     | 6             | -7,503                  | 2,6082  | -3,426 |
| 22     | 7             | 7,993                   | 1,025  | 1,752  | 97     | 6             | -5,236                  | 2,1103  | -2,760 |
| 23     | 6             | 7,087                   | 1,531  | 2,621  | 98     | 7             | -7,106                  | 1,1657  | -1,540 |
| 24     | 6             | 8,828                   | 2,241  | 4,129  | 99     | 6             | -7,957                  | 1,8021  | -2,377 |
| 25     | 1             | 10,827                  | 1,785  | 3,459  | 100    | 6             | -6,124                  | 2,7664  | -3,623 |
| 26     | 1             | 6,044                   | 1,438  | 2,347  | 101    | 1             | -4,162                  | 2,1984  | -2,868 |
| 27     | 1             | 9,153                   | 2,712  | 5,050  | 102    | 1             | -9,016                  | 1,6596  | -2,197 |
| 28     | 1             | 6,704                   | 2,536  | 4,482  | 103    | 1             | -8,223                  | 3,0982  | -4,070 |
| 29     | 44            | 7,591                   | 0,083  | -0,058 | 104    | 44            | -7,591                  | -0,0678 | 0,071  |
| 30     | 7             | 5,616                   | 0,163  | -0,091 | 105    | 7             | -9,580                  | -0,0222 | 0,004  |
| 31     | 6             | 2,891                   | 0,175  | -0,080 | 106    | 6             | -12,358                 | 0,0444  | -0,094 |
| 32     | 6             | 4,987                   | 1,230  | -0,657 | 107    | 6             | -10,242                 | 0,9422  | 0,698  |
| 33     | 6             | 4,897                   | -0,850 | 0,460  | 108    | 6             | -10,237                 | -0,9551 | -0,736 |
| 34     | 7             | 3,564                   | -0,873 | 0,481  | 109    | 6             | -11,631                 | -0,9388 | -0,801 |
| 35     | 6             | 3,592                   | 1,258  | -0,662 | 110    | 6             | -11,636                 | 0,9928  | 0,664  |
| 36     | 1             | 3,061                   | 2,097  | -1,090 | 111    | 1             | -12,155                 | -1,6638 | -1,411 |
| 37     | 7             | 7,101                   | -1,705 | 0,898  | 112    | 1             | -12,166                 | 1,7436  | 1,237  |
| 38     | 6             | 6,109                   | -4,017 | 2,139  | 113    | 7             | -7,993                  | 1,5636  | 1,297  |
| 39     | 6             | 5,743                   | -1,913 | 1,022  | 114    | 6             | -8,831                  | 3,7041  | 2,892  |
| 40     | 6             | 7,948                   | -2,639 | 1,387  | 115    | 6             | -7,089                  | 2,3370  | 1,941  |
| 41     | 6             | 7,489                   | -3,804 | 2,011  | 116    | 6             | -9,337                  | 1,8406  | 1,435  |
| 42     | 6             | 5,225                   | -3,054 | 1,635  | 117    | 6             | -9,772                  | 2,9069  | 2,229  |
| 43     | 1             | 9,007                   | -2,445 | 1,272  | 118    | 6             | -7,469                  | 3,4140  | 2,745  |
| 44     | 1             | 8,206                   | -4,523 | 2,387  | 119    | 1             | -6,045                  | 2,0825  | 1,805  |
| 45     | 1             | 4,150                   | -3,169 | 1,706  | 120    | 1             | -10,830                 | 3,1157  | 2,332  |
| 46     | 7             | 7,266                   | 1,897  | -1,024 | 121    | 1             | -6,708                  | 4,0052  | 3,241  |
| 47     | 6             | 6,531                   | 4,288  | -2,288 | 122    | 1             | -9,157                  | 4,5331  | 3,509  |
| 48     | 6             | 8,209                   | 2,750  | -1,484 | 123    | 7             | -7,984                  | -1,6804 | -1,183 |
| 49     | 6             | 5,932                   | 2,222  | -1,187 | 124    | 6             | -8,810                  | -3,7823 | -2,834 |
| 50     | 6             | 5,549                   | 3,411  | -1,815 | 125    | 6             | -9,327                  | -1,8956 | -1,412 |
| 51     | 6             | 7,881                   | 3,951  | -2,119 | 126    | 6             | -7,074                  | -2,4955 | -1,765 |
| 52     | 1             | 9,241                   | 2,459  | -1,336 | 127    | 6             | -7,448                  | -3,5548 | -2,595 |
| 53     | 1             | 4,499                   | 3,651  | -1,933 | 128    | 6             | -9,755                  | -2,9422 | -2,235 |
| 54     | 1             | 8,673                   | 4,602  | -2,471 | 129    | 1             | -6,032                  | -2,2895 | -1,558 |
| 55     | 6             | 13,836                  | -0,174 | 0,066  | 130    | 1             | -6,684                  | -4,1811 | -3,040 |
| 56     | 6             | 16,685                  | -0,292 | 0,124  | 131    | 1             | -10,813                 | -3,1024 | -2,408 |
| 57     | 6             | 14,530                  | -1,242 | -0,539 | 132    | 1             | -9,131                  | -4,5963 | -3,474 |
| 58     | 6             | 14,591                  | 0,833  | 0,702  | 133    | 6             | -13,836                 | 0,0802  | -0,147 |
| 59     | 6             | 15,988                  | 0,773  | 0,728  | 134    | 6             | -16,685                 | 0,1486  | -0,249 |
| 60     | 6             | 15,927                  | -1,300 | -0,506 | 135    | 6             | -14,537                 | 1,2995  | -0,039 |
| 61     | 1             | 13,982                  | -2,053 | -1,010 | 136    | 6             | -14,585                 | -1,1046 | -0,304 |
| 62     | 1             | 14,094                  | 1,685  | 1,159  | 137    | 6             | -15,983                 | -1,0685 | -0,350 |
| 63     | 1             | 16,547                  | 1,566  | 1,219  | 138    | 6             | -15,934                 | 1,3302  | -0,090 |
| 64     | 1             | 16,436                  | -2,142 | -0,967 | 139    | 1             | -13,994                 | 2,2355  | 0,059  |
| 65     | 6             | 1,416                   | 0,117  | -0,036 | 140    | 1             | -14,083                 | -2,0663 | -0,358 |
| 66     | 6             | -1,415                  | -0,040 | 0,097  | 141    | 1             | -16,536                 | -1,9977 | -0,458 |
| 67     | 6             | 0,782                   | -0,849 | 0,774  | 142    | 1             | -16,449                 | 2,2841  | -0,011 |
| 68     | 6             | 0,609                   | 0,997  | -0,787 | 143    | 6             | -18,190                 | 0,1879  | -0,330 |
| 69     | 6             | -0,782                  | 0,916  | -0,724 | 144    | 1             | -18,636                 | -0,7374 | 0,049  |
| 70     | 6             | -0,608                  | -0,925 | 0,843  | 145    | 1             | -18,520                 | 0,3070  | -1,371 |
| 71     | 1             | 1,395                   | -1,537 | 1,345  | 146    | 1             | -18,601                 | 1,0278  | 0,240  |
| 72     | 1             | 1,051                   | 1,744  | -1,439 | 147    | 1             | 6,248                   | 5,2136  | -2,776 |
| 73     | 1             | -1,395                  | 1,592  | -1,309 | 148    | 1             | -6,230                  | -3,5785 | 4,690  |
| 74     | 1             | -1,050                  | -1,690 | 1,472  | 149    | 1             | 5,730                   | -4,9113 | 2,620  |
| 75     | 6             | 18,192                  | -0,340 | 0,130  | 150    | 1             | -5,748                  | 3,3862  | -4,429 |

Table S.I. 3. Atomic coordinates of the optimized geometry of C2.

| Center | Atomic number | Coordinates (Angstroms) |        |        | Center | Atomic number | Coordinates (Angstroms) |        |        |
|--------|---------------|-------------------------|--------|--------|--------|---------------|-------------------------|--------|--------|
|        |               | X                       | Y      | Z      |        |               | X                       | Y      | Z      |
| 1      | 7             | 9.568                   | 0.529  | -0.033 | 85     | 1             | 4.057                   | -5.278 | 1.261  |
| 2      | 6             | 12.348                  | 0.545  | -0.058 | 86     | 1             | 7.581                   | -6.452 | -0.975 |
| 3      | 6             | 10.217                  | 0.508  | -1.228 | 87     | 1             | 6.768                   | -8.789 | -0.847 |
| 4      | 6             | 10.238                  | 0.558  | 1.149  | 88     | 1             | 3.382                   | -7.662 | 1.267  |
| 5      | 6             | 11.634                  | 0.562  | 1.161  | 89     | 6             | -2.876                  | -0.336 | 0.043  |
| 6      | 6             | 11.612                  | 0.520  | -1.263 | 90     | 7             | -5.599                  | -0.485 | 0.020  |
| 7      | 1             | 12.169                  | 0.554  | 2.102  | 91     | 7             | -3.617                  | 0.812  | 0.061  |
| 8      | 1             | 12.131                  | 0.533  | -2.214 | 92     | 6             | -3.507                  | -1.603 | 0.010  |
| 9      | 6             | 9.299                   | 0.482  | -2.379 | 93     | 6             | -4.901                  | -1.654 | -0.001 |
| 10     | 6             | 7.407                   | 0.431  | -4.404 | 94     | 6             | -4.946                  | 0.706  | 0.049  |
| 11     | 7             | 7.957                   | 0.477  | -2.061 | 95     | 1             | -2.925                  | -2.513 | -0.020 |
| 12     | 6             | 9.720                   | 0.462  | -3.712 | 96     | 6             | -5.780                  | -2.831 | -0.039 |
| 13     | 6             | 8.768                   | 0.437  | -4.738 | 97     | 6             | -7.612                  | -4.903 | -0.113 |
| 14     | 6             | 7.041                   | 0.451  | -3.056 | 98     | 7             | -7.133                  | -2.545 | -0.048 |
| 15     | 1             | 10.776                  | 0.466  | -3.951 | 99     | 6             | -5.320                  | -4.150 | -0.067 |
| 16     | 1             | 9.083                   | 0.421  | -5.775 | 100    | 6             | -6.243                  | -5.202 | -0.104 |
| 17     | 1             | 6.000                   | 0.447  | -2.760 | 101    | 6             | -8.018                  | -3.566 | -0.084 |
| 18     | 1             | 6.638                   | 0.411  | -5.166 | 102    | 1             | -4.256                  | -4.357 | -0.059 |
| 19     | 6             | 9.341                   | 0.573  | 2.317  | 103    | 1             | -9.068                  | -3.300 | -0.090 |
| 20     | 6             | 7.485                   | 0.608  | 4.376  | 104    | 1             | -8.359                  | -5.687 | -0.141 |
| 21     | 6             | 9.785                   | 0.605  | 3.642  | 105    | 6             | -5.860                  | 1.857  | 0.069  |
| 22     | 7             | 7.993                   | 0.558  | 2.023  | 106    | 6             | -7.709                  | 3.889  | 0.093  |
| 23     | 6             | 7.095                   | 0.576  | 3.035  | 107    | 6             | -5.414                  | 3.175  | 0.106  |
| 24     | 6             | 8.852                   | 0.622  | 4.685  | 108    | 7             | -7.200                  | 1.537  | 0.046  |
| 25     | 1             | 10.846                  | 0.618  | 3.862  | 109    | 6             | -8.097                  | 2.550  | 0.058  |
| 26     | 1             | 6.049                   | 0.566  | 2.758  | 110    | 6             | -6.342                  | 4.232  | 0.120  |
| 27     | 1             | 9.185                   | 0.647  | 5.716  | 111    | 1             | -4.344                  | 3.350  | 0.104  |
| 28     | 1             | 6.730                   | 0.621  | 5.151  | 112    | 1             | -9.144                  | 2.275  | 0.044  |
| 29     | 44            | 7.576                   | 0.510  | -0.015 | 113    | 1             | -8.480                  | 4.650  | 0.123  |
| 30     | 7             | 5.600                   | 0.487  | 0.001  | 114    | 6             | -5.899                  | 5.644  | 0.162  |
| 31     | 6             | 2.877                   | 0.343  | 0.023  | 115    | 7             | -5.053                  | 8.348  | 0.246  |
| 32     | 6             | 4.904                   | 1.659  | -0.014 | 116    | 6             | -4.696                  | 6.014  | 0.794  |
| 33     | 6             | 4.945                   | -0.702 | 0.032  | 117    | 6             | -6.666                  | 6.669  | -0.425 |
| 34     | 7             | 3.616                   | -0.806 | 0.041  | 118    | 6             | -6.209                  | 7.990  | -0.361 |
| 35     | 6             | 3.511                   | 1.609  | 0.001  | 119    | 6             | -4.317                  | 7.361  | 0.813  |
| 36     | 1             | 2.931                   | 2.521  | 0.005  | 120    | 1             | -4.067                  | 5.281  | 1.288  |
| 37     | 7             | 7.198                   | -1.537 | 0.029  | 121    | 1             | -7.592                  | 6.454  | -0.948 |
| 38     | 6             | 6.335                   | -4.230 | 0.097  | 122    | 1             | -6.784                  | 8.792  | -0.813 |
| 39     | 6             | 5.857                   | -1.855 | 0.051  | 123    | 1             | -3.397                  | 7.666  | 1.300  |
| 40     | 6             | 8.093                   | -2.551 | 0.040  | 124    | 44            | -7.575                  | -0.511 | -0.005 |
| 41     | 6             | 7.702                   | -3.890 | 0.072  | 125    | 7             | -9.566                  | -0.532 | -0.034 |
| 42     | 6             | 5.408                   | -3.172 | 0.085  | 126    | 6             | -12.347                 | -0.552 | -0.074 |
| 43     | 1             | 9.140                   | -2.279 | 0.028  | 127    | 6             | -10.243                 | -0.566 | 1.145  |
| 44     | 1             | 8.471                   | -4.653 | 0.101  | 128    | 6             | -10.209                 | -0.509 | -1.232 |
| 45     | 1             | 4.338                   | -3.345 | 0.081  | 129    | 6             | -11.604                 | -0.522 | -1.275 |
| 46     | 7             | 7.138                   | 2.545  | -0.052 | 130    | 6             | -11.639                 | -0.572 | 1.148  |
| 47     | 6             | 6.253                   | 5.204  | -0.098 | 131    | 1             | -12.117                 | -0.533 | -2.229 |
| 48     | 6             | 8.025                   | 3.565  | -0.081 | 132    | 1             | -12.179                 | -0.568 | 2.087  |
| 49     | 6             | 5.786                   | 2.834  | -0.044 | 133    | 7             | -8.003                  | -0.566 | 2.030  |
| 50     | 6             | 5.327                   | 4.154  | -0.067 | 134    | 6             | -8.875                  | -0.642 | 4.688  |
| 51     | 6             | 7.621                   | 4.903  | -0.105 | 135    | 6             | -7.110                  | -0.587 | 3.047  |
| 52     | 1             | 9.074                   | 3.297  | -0.086 | 136    | 6             | -9.352                  | -0.585 | 2.317  |
| 53     | 1             | 4.264                   | 4.362  | -0.063 | 137    | 6             | -9.803                  | -0.623 | 3.640  |
| 54     | 1             | 8.370                   | 5.685  | -0.128 | 138    | 6             | -7.507                  | -0.624 | 4.385  |
| 55     | 6             | 13.828                  | 0.554  | -0.072 | 139    | 1             | -6.062                  | -0.573 | 2.776  |
| 56     | 6             | 16.680                  | 0.568  | -0.097 | 140    | 1             | -10.865                 | -0.639 | 3.853  |
| 57     | 6             | 14.547                  | -0.083 | -1.104 | 141    | 1             | -6.756                  | -0.639 | 5.165  |
| 58     | 6             | 14.559                  | 1.196  | 0.950  | 142    | 1             | -9.214                  | -0.672 | 5.717  |
| 59     | 6             | 15.958                  | 1.202  | 0.934  | 143    | 7             | -7.945                  | -0.471 | -2.053 |
| 60     | 6             | 15.946                  | -0.077 | -1.112 | 144    | 6             | -8.741                  | -0.423 | -4.734 |
| 61     | 1             | 14.020                  | -0.616 | -1.891 | 145    | 6             | -9.285                  | -0.478 | -2.378 |
| 62     | 1             | 14.041                  | 1.718  | 1.749  | 146    | 6             | -7.024                  | -0.441 | -3.043 |
| 63     | 1             | 16.497                  | 1.710  | 1.729  | 147    | 6             | -7.382                  | -0.416 | -4.393 |
| 64     | 1             | 16.476                  | -0.588 | -1.912 | 148    | 6             | -9.699                  | -0.454 | -3.714 |
| 65     | 6             | 1.408                   | 0.188  | 0.031  | 149    | 1             | -5.984                  | -0.436 | -2.742 |
| 66     | 6             | -1.408                  | -0.178 | 0.047  | 150    | 1             | -6.609                  | -0.393 | -5.151 |
| 67     | 6             | 0.846                   | -1.092 | 0.220  | 151    | 1             | -10.754                 | -0.459 | -3.958 |
| 68     | 6             | 0.537                   | 1.283  | -0.148 | 152    | 1             | -9.051                  | -0.405 | -5.773 |
| 69     | 6             | -0.845                  | 1.102  | -0.138 | 153    | 6             | -13.826                 | -0.561 | -0.095 |
| 70     | 6             | -0.537                  | -1.274 | 0.229  | 154    | 6             | -16.678                 | -0.581 | -0.136 |
| 71     | 1             | 1.507                   | -1.938 | 0.363  | 155    | 6             | -14.562                 | -1.210 | 0.919  |
| 72     | 1             | 0.921                   | 2.284  | -0.312 | 156    | 6             | -14.541                 | 0.075  | -1.131 |
| 73     | 1             | -1.507                  | 1.948  | -0.280 | 157    | 6             | -15.940                 | 0.064  | -1.148 |
| 74     | 1             | -0.921                  | -2.274 | 0.392  | 158    | 6             | -15.960                 | -1.221 | 0.895  |
| 75     | 6             | 18.187                  | 0.600  | -0.126 | 159    | 1             | -14.047                 | -1.739 | 1.716  |
| 76     | 1             | 18.546                  | 1.477  | -0.680 | 160    | 1             | -14.011                 | 0.606  | -1.916 |
| 77     | 1             | 18.596                  | -0.288 | -0.619 | 161    | 1             | -16.467                 | 0.568  | -1.954 |
| 78     | 1             | 18.606                  | 0.658  | 0.884  | 162    | 1             | -16.502                 | -1.741 | 1.680  |
| 79     | 6             | 5.890                   | -5.642 | 0.136  | 163    | 6             | -18.185                 | -0.569 | -0.142 |
| 80     | 7             | 5.037                   | -8.344 | 0.213  | 164    | 1             | -18.581                 | -0.511 | -1.161 |
| 81     | 6             | 4.685                   | -6.011 | 0.766  | 165    | 1             | -18.569                 | 0.301  | 0.407  |
| 82     | 6             | 6.655                   | -6.667 | -0.453 | 166    | 1             | -18.595                 | -1.463 | 0.338  |
| 83     | 6             | 6.195                   | -7.987 | -0.393 | 167    | 1             | 5.912                   | 6.233  | -0.116 |
| 84     | 6             | 4.304                   | -7.358 | 0.781  | 168    | 1             | -5.900                  | -6.230 | -0.126 |



## S.I.-6 Hydrogen production experiments

Hydrogen evolution was monitored using a Perkin Elmer Clarus-480 gas chromatograph (GC) with a thermal conductivity detector, argon as carrier and eluent gas, a 7 ft. HayeSep N 60/80 pre-column, a 9 ft. molecular sieve 13 x 45/60 column and a 2 mL injection loop. Three distinct solutions for the sacrificial electron donor and proton source, the photosensitizer and the catalyst were prepared and mixed together to obtain 5 mL of solutions in standard 20 mL headspace vials. Using DMF as a solvent, the resulting molar concentration of photocatalytic medium are: 1 M for triethanolamine (TEOA), 0.1 M for HBF<sub>4</sub>, 0.56 M for water ( $pH_{\text{apparent}} = 8.9$ ). The concentration of active species were: 0.1 mM for the photosensitizer, 1 mM of cobalt pre-catalyst ([Co(H<sub>2</sub>O)<sub>6</sub>](BF<sub>4</sub>)<sub>2</sub>) or cobalt catalyst [Co(dmGH)<sub>2</sub>(py)Cl] and 6 mM of dimethylglyoxime.

The vials were placed on top of a 450 nm (blue-light irradiation) or a 630 nm (red-light irradiation) centered LED set to an approximate 62 mW (blue light) or 45 mW (red light) output, in an aluminum cast connected to a thermostatic bath set at 20 °C. They were sealed with a rubber septum pierced with two stainless steel tubes. The first tube carried an argon flow pre-bubbled in DMF. The flow was set between 5 mL/min and 10 mL/min (adjusted with calibrated mass flow MCseries from Alicat) and referenced with a digital flowmeter (Perkin Elmer FlowMark) depending on the sample. The second tube led the flow to the GC sample loop through a 2 mL overflow protection vial, then through an 8-port stream select valve (VICCI) and finally to GC sample loop. A microprocessor (Arduino Uno) coupled with a custom PC interface allowed for timed injections. For calibration of the H<sub>2</sub> production rate at a specific argon flow, a syringe pump (New Era Pump) equipped with a gas-tight syringe (SGE) and a 26s gauge needle (Hamilton) was used to bubble different rates of pure hydrogen gas into the sample, to a minimum of 0.5 μL/minute. This gave a linear fit for the peak area of H<sub>2</sub> vs. the flow rates of H<sub>2</sub>. For calibration testing, stock cylinders of known concentration of H<sub>2</sub> in argon replaced the argon flow (inserted at the pre-bubbler, to keep the same vapor matrix). The measured results, independent of flow rate (under same pressure) can be easily converted into a rate of hydrogen production following Equation S.I. 5. The errors associated to the *TON* (turn-over number) and *TOF* (turn-over frequency) were estimated to be within 10 %.<sup>13</sup>

$$H_2 \text{ rate } (\mu\text{L}/\text{min}) = [H_2 \text{ standard}] \text{ (ppm)} \times \text{Ar flow rate (mL}/\text{min)} \quad \text{Equation S.I. 2}$$

$$H_2 \text{ rate (nmol}/\text{min}) = H_2 \text{ rate } (\mu\text{L}/\text{min}) / 24.45 \times 1000 \quad \text{Equation S.I. 3}$$

$$\text{TOF (mmol}_{H_2}\cdot\text{mol}_{PS}^{-1}\cdot\text{min}^{-1}) = H_2 \text{ rate (nmol}/\text{min}) / n_{PS} \text{ (mol)} / 10^6 \quad \text{Equation S.I. 4}$$

The amount of hydrogen produced between two injections is calculated using the average rate over that period of time [t<sub>i</sub> ; t<sub>j</sub>], multiplied by the time between two injections (t<sub>j</sub>-t<sub>i</sub>).

$$n_{H_2 \text{ total}} \text{ (nmol)} = \sum_{t_0}^{t_f} n_{H_2} [t_i ; t_j] = \sum_{t_0}^{t_f} (H_2 \text{ rate (t}_i) + H_2 \text{ rate (t}_j) ) / 2 \times (t_j - t_i) \quad \text{Equation S.I. 5}$$

$$\text{For a chosen length of experiment (t}_f) \quad \text{TON(t}_f) = n_{H_2(t_f)} / n_{PS} \quad \text{Equation S.I. 6}$$

A Savitzky-Golay smoothing with software Origin was applied for the data of TOFs.

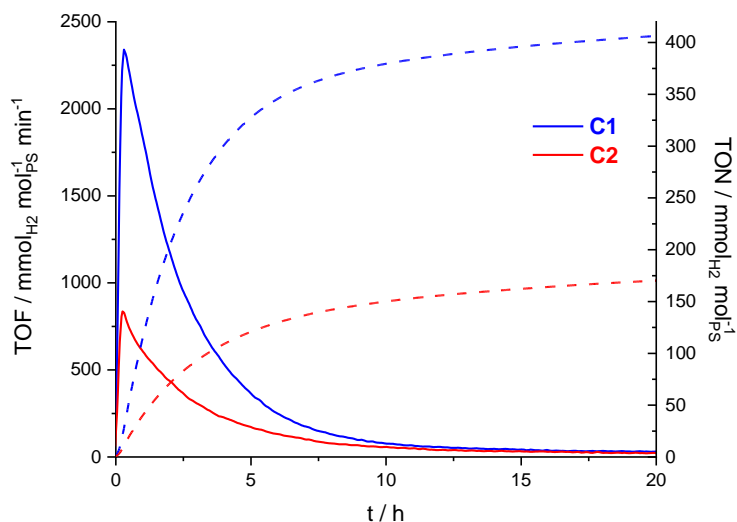

Figure S.I. 24. Hydrogen production of dinuclear complexes **C1** and **C2** as PS (0.1 mM) under blue-light irradiation (LED centered at 445 nm); using  $[\text{Co}(\text{dmgH})_2(\text{py})\text{Cl}]$  as catalyst (1 mM), dmgH<sub>2</sub> (6 mM), TEOA as sacrificial electron donor (1 M) and HBF<sub>4</sub> as proton source (0.1 M) in DMF; TOF: solid lines; TON: dashed lines.

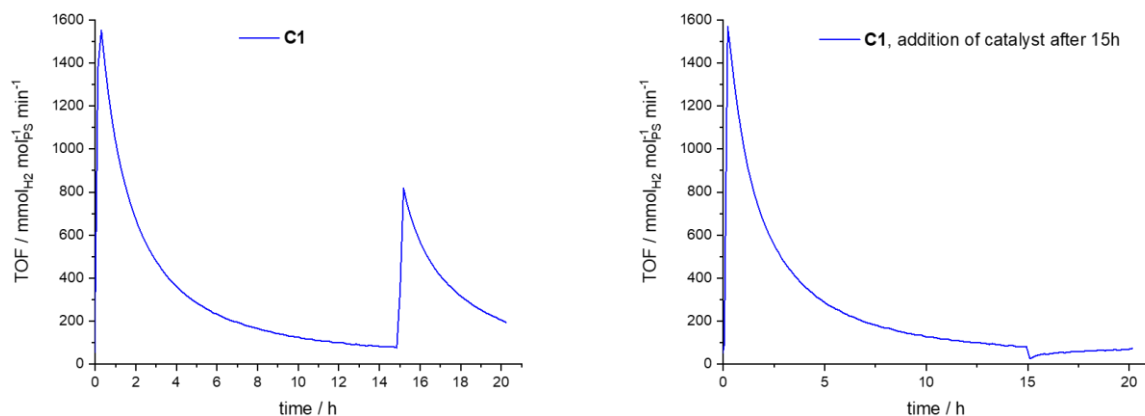

Figure S.I. 25. Hydrogen production of dinuclear complex **C1** as PS (0.1 mM) under blue-light irradiation (LED centered at 445 nm); using  $[\text{Co}(\text{H}_2\text{O})_6](\text{BF}_4)_2$  as pre-catalyst (1 mM), dmgH<sub>2</sub> (6 mM), TEOA as sacrificial electron donor (1 M) and HBF<sub>4</sub> as proton source (0.1 M) in DMF; left: addition of same amount of **C1** in 0.25 ml DMF after 15 h; right: addition of same amount of  $[\text{Co}(\text{H}_2\text{O})_6](\text{BF}_4)_2$  and dmgH<sub>2</sub> in 0.25 mL DMF after 15 h.

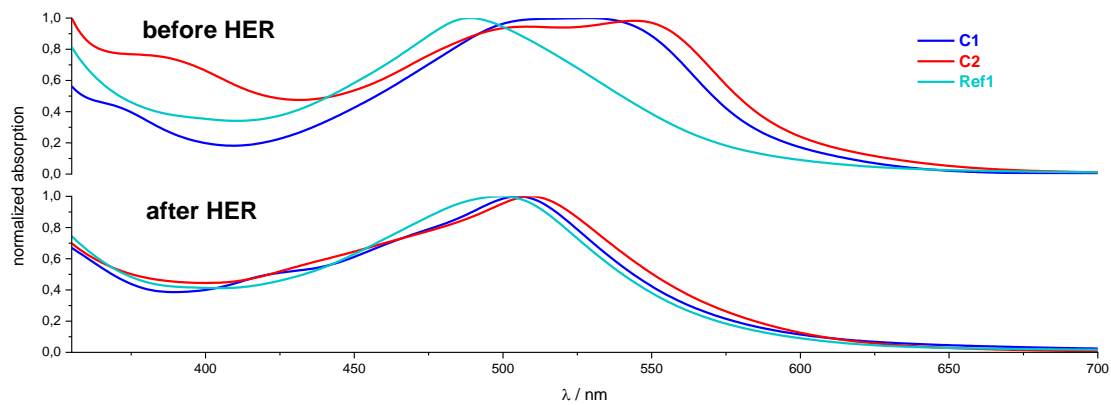

Figure S.I. 26. UV-vis absorption spectra of DMF solutions containing **C1**, **C2** or **Ref1** (0.1 mM);  $[\text{Co}(\text{H}_2\text{O})_6](\text{BF}_4)_2$  (1 mM),  $\text{dmgH}_2$  (6 mM), TEOA (1 M) and  $\text{HBF}_4$  (0.1 M) before (upper graph) and after (lower graph) 23 h under blue-light irradiation (LED centered at 445 nm).

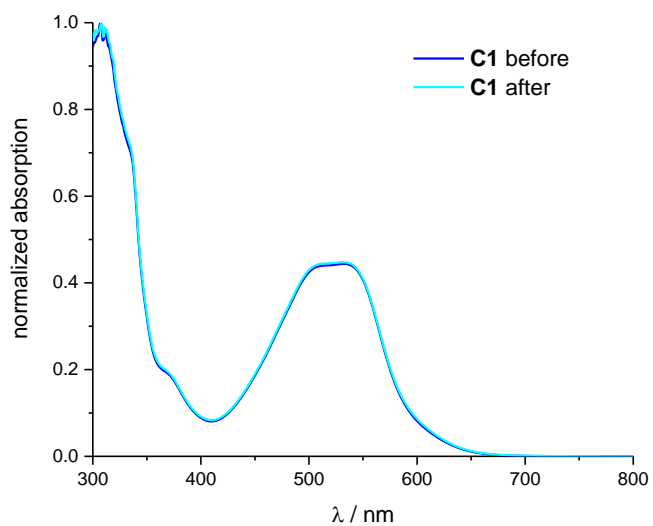

Figure S.I. 27. UV-vis absorption spectra of **C1** in DMF (0.1 mM) before and after 18 h under blue-light irradiation (LED centered at 445 nm).

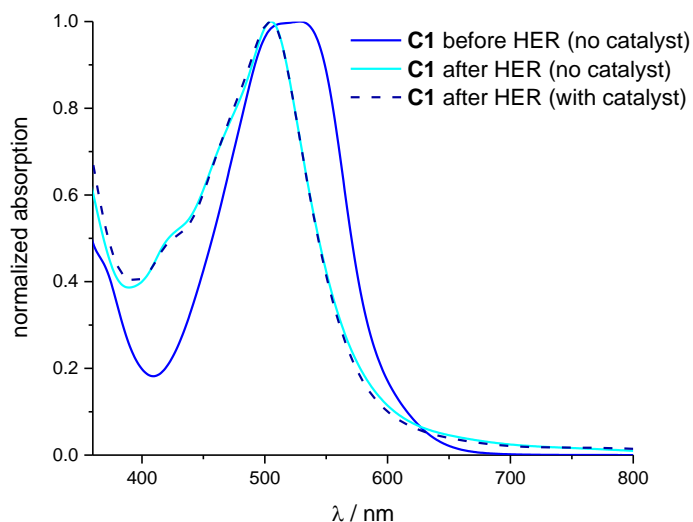

Figure S.I. 28. UV-vis absorption spectra of DMF solutions containing **C1** (0.1 mM), TEOA (1 M) and  $\text{HBF}_4$  (0.1 M) before and after 18 h under blue-light irradiation (LED centered at 445 nm) (solid lines), and of a DMF solution containing **C1** (0.1 mM),  $[\text{Co}(\text{H}_2\text{O})_6](\text{BF}_4)_2$  (1 mM),  $\text{dmgH}_2$  (6 mM), TEOA (1 M) and  $\text{HBF}_4$  (0.1 M) after 18 h under blue light irradiation (dashed line).

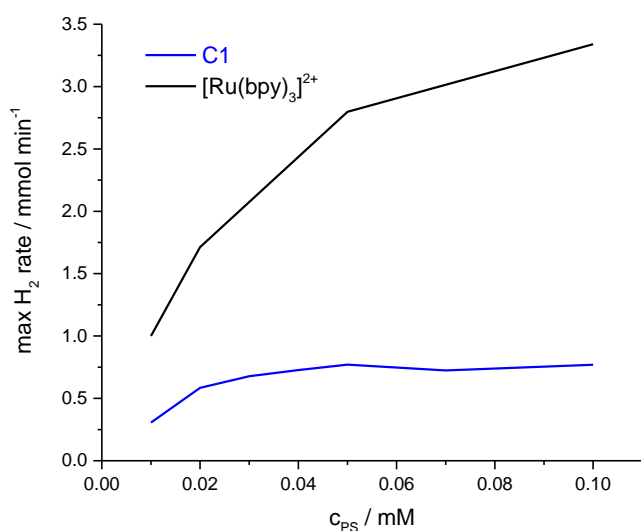

Figure S.I. 29. Maximum hydrogen production rate of dinuclear complex **C1** in comparison with  $[\text{Ru}(\text{bpy})_3]^{2+}$  for different concentrations of PS in a DMF solution with  $[\text{Co}(\text{H}_2\text{O})_6](\text{BF}_4)_2$  as pre-catalyst (1 mM),  $\text{dmgH}_2$  (6 mM), TEOA as sacrificial electron donor (1 M) and  $\text{HBF}_4$  as proton source (0.1 M) under blue-light irradiation (LED centered at 445 nm).

## S.I.-7 References

1. J. N. Demas and G. A. Crosby, *J. Phys. Chem.*, 1971, **75**, 991-1024.
2. K. E. Spettel and N. H. Damrauer, *J. Phys. Chem. A*, 2014, **118**, 10649-10662.
3. N. G. Connelly and W. E. Geiger, *Chem. Rev.*, 1996, **96**, 877-910.
4. M. J. Frisch, G. W. Trucks, H. B. Schlegel, G. E. Scuseria, M. A. Robb, J. R. Cheeseman, G. Scalmani, V. Barone, G. A. Petersson, H. Nakatsuji, X. Li, M. Caricato, A. V. Marenich, J. Bloino, B. G. Janesko, R. Gomperts, B. Mennucci, H. P. Hratchian, J. V. Ortiz, A. F. Izmaylov, J. L. Sonnenberg, Williams, F. Ding, F. Lipparini, F. Egidi, J. Goings, B. Peng, A. Petrone, T. Henderson, D. Ranasinghe, V. G. Zakrzewski, J. Gao, N. Rega, G. Zheng, W. Liang, M. Hada, M. Ehara, K. Toyota, R. Fukuda, J. Hasegawa, M. Ishida, T. Nakajima, Y. Honda, O. Kitao, H. Nakai, T. Vreven, K. Throssell, J. A. Montgomery Jr., J. E. Peralta, F. Ogliaro, M. J. Bearpark, J. J. Heyd, E. N. Brothers, K. N. Kudin, V. N. Staroverov, T. A. Keith, R. Kobayashi, J. Normand, K. Raghavachari, A. P. Rendell, J. C. Burant, S. S. Iyengar, J. Tomasi, M. Cossi, J. M. Millam, M. Klene, C. Adamo, R. Cammi, J. W. Ochterski, R. L. Martin, K. Morokuma, O. Farkas, J. B. Foresman and D. J. Fox, *Journal*, 2016.
5. C. Adamo and V. Barone, *J. Chem. Phys.*, 1999, **110**, 6158-6170.
6. T. H. Dunning Jr and P. J. Hay, *Modern Theoretical Chemistry III ed.*, Plenum, New York, 1977.
7. P. J. Hay and W. R. Wadt, *J. Chem. Phys.*, 1985, **82**, 270-283.
8. P. J. Hay and W. R. Wadt, *J. Chem. Phys.*, 1985, **82**, 299-310.
9. W. R. Wadt and P. J. Hay, *J. Chem. Phys.*, 1985, **82**, 284-298.
10. N. M. O'Boyle, A. L. Tenderholt and K. M. Kangner, *J. Comput. Chem.*, 2008, **29**, 839-845.
11. S. Leonid, *V 4.53*, 2005-2017, [www.chemissian.com](http://www.chemissian.com).
12. M. Cossi, N. Rega, G. Scalmani and V. Barone, *J. Comput. Chem.*, 2003, **24**, 669-681.
13. C. Lentz, O. Schott, T. Auvray, G. Hanan and B. Elias, *Inorg. Chem.*, 2017, **56**, 10875-10881.
